# Supplementary material
Source: MDPI journal article supplement (https://www.mdpi.com/2076-3298/11/4/83)
Supplement: s1 [file s1]

**Table S1:** Beach contamination by microplastics along the Mediterranean basin. Termoplastic Polyurethane (TPU), Polyestradiol Phosphate (PEP), Polyester (PES), Polyacrylonitrile (PAN), Alkid resin (AL), Polyvinyl Alcohol (PVOH), Synthet Cellulose (SC), Butyl Branham (BB), Ethylene Propylene (EPR), Cellulose Triacetate (CTA), Styrene Acrylonitrile (copolymer) (SAN), Epoxy Polyester (EPP), Expanded Polystyrene (EPS), Polypropylene Atactic (PP-at), Poly Vinylidene Chloride (PVCD), Ethylene Propylene Dien Monomen (EPDM), Polyethylene (PE), Polypropylene (PP9, Polystyrene (PS), Poly Vinyl Chloride (PVC), Ethylene Vinyl Acetate (EVA), High Densi-ty Polyethylene (HDPE), Low Density Polyethylene (LDPE), Linear Low Density Polyethylene (LLDPE), Poly Ethylene Terephtalate (PET), Poly Ethylene Vinyl Acetate (PEVA), Polyamide (PA), isotactic Propylene (iPP), syndiotactic Propylene (sPP), Poly Tetra Fluoro Ethylene (PTFE), syndiotactic Polystyrene (sPS), Poly Vynil Alcohol (PVA), Phenol Formaldehyde (PF), Polyurethane (PU), Acrylonitrile butadiene styrene (ABS), Styrene-Butadiene-Styrene Copolymer (SBS).

| GSAs | Extraction process          | N items/kg      | Polymers                                        | Identification method | References |
|------|-----------------------------|-----------------|-------------------------------------------------|-----------------------|------------|
| 17   | Visual sorting              | 12.1            | PE, PP, Nylon, PS, PET, PVC, TPU                | FT-IR                 | [71]       |
| 17   | Density separation modified | 672 – 2175      | PE, PP, PEP, PES, PS, PAN, AL, PVC, PVOH, Nylon | μFT-IR                | [76]       |
|      |                             |                 | PE                                              |                       |            |
| 12   | Density separation          | 141.20 – 461.25 |                                                 | FTIR-ATR              | [61]       |
|      |                             |                 | PP                                              |                       |            |
| 7    | Density separation modified | 33-798          | PP, PE, PS                                      | FT-IR                 | [56]       |

|                           |                                                                                  |                 |                                |                                 |      |
|---------------------------|----------------------------------------------------------------------------------|-----------------|--------------------------------|---------------------------------|------|
|                           |                                                                                  | 12-187          | PP, PE, PS                     |                                 |      |
| 6,7, 8, 15, 17,<br>22, 27 | Density separation adapted                                                       | 76-1512         | PE, PP, PL                     | Raman Spectroscopy              | [74] |
| 6                         | Sieve, visual sorting and<br>buoyancy in saturated NaCl<br>and ZnCl <sub>2</sub> | 10,7            | PP, PS, PE, PET, PL, PA,<br>SC | FTIR-ATR, Raman<br>Spectroscopy | [67] |
|                           |                                                                                  |                 | PE, PP, PET, PS, BB            |                                 |      |
| 4                         | Density and elutriation<br>separation                                            | 182.66 – 649.33 | EPR, CTA                       | FTIR-ATR                        | [57] |
| 6                         | Density separation                                                               | 32,8            | PA, PP, PE, PET                | FT-IR                           | [66] |
| 6                         | Sieving                                                                          | 3125.5          | HDPE, LDPE, PP, PS             | FTIR-ATR                        | [77] |
| 17                        | Density separation modified                                                      | 0 – 44.6        | PET, PE, PP, SAN, PS,<br>Nylon | FTIR-ATR                        | [70] |

|    |                                            |            |                                                             |                                            |            |
|----|--------------------------------------------|------------|-------------------------------------------------------------|--------------------------------------------|------------|
|    |                                            | 0 – 82.1   | PET, PE, PP, PS, EPS,<br>Nylon, EPP                         |                                            |            |
| 3  | Sieving and density separation<br>modified | 40-230     | PE, PS, PP, PVC                                             | FT-IR                                      | [60]       |
| 4  | Sieving and visual sorting                 | 7.6-66.0   | -                                                           | -                                          | [63]       |
| 4  | Sieving and visual sorting                 | 43.62-72.0 | -                                                           | -                                          | [65]       |
| 12 | Sieving and visual sorting                 | 2,46       | HDPE, PP, PE                                                | FT-IR                                      | [62]       |
| 26 | Density separation modified                | 165-714    | LDPE, LLDPE, HDPE, PA,<br>iPP, sPP, PET, PEVA,<br>PTFE, sPS | Differential scanning<br>calorimetry (DSC) | [59]       |
| 4  | Sieving and visual sorting                 | 73         | PVA, PA, PE, PP, PS, PVC,<br>PF                             | FTIR-ATR                                   | [64]       |
| 3  | Density separation modified<br>[51]        | 390-995    | PS, PE, PP, PET                                             | Raman Spectroscopy                         | This study |

---

GSA: geographical subarea; GSA 3 - Southern Alboran Sea; GSA 4 - Algeria; GSA 6 – Northern Spain; GSA 7 - Gulf of Lion; GSA 8 - Corsica; GSA 9 - Ligurian and Northern Tyrrhenian Sea; GSA 10 - Central and Southern Tyrrhenian Sea; GSA 11 - Sardinia; GSA 12 - Northern Tunisia; GSA 15 - Malta; GSA 16 - Southern Sicily; GSA 17 - Northern Adriatic Sea; GSA 18 - Southern Adriatic Sea; GSA 19 - Western Ionian Sea; GSA 22 - Aegean Sea; GSA 26 - South Levant Sea; GSA 27 - Eastern Levant Sea.
